# Supplementary material for: The prognostic implication of intraductal carcinoma of the prostate in metastatic castration-resistant prostate cancer and its potential predictive value in those treated with docetaxel or abiraterone as first-line therapy
Source: PubMed Central journal article supplement (PMC5589665; doi:10.18632/oncotarget.19520), 2017-07-24
Supplement: oncotarget-08-55374-s001.pdf [file oncotarget-08-55374-s001.pdf]

# The prognostic implication of intraductal carcinoma of the prostate in metastatic castration-resistant prostate cancer and its potential predictive value in those treated with docetaxel or abiraterone as first-line therapy

## SUPPLEMENTARY MATERIALS

**Supplementary Table 1: Log-rank analysis of the predictors for OS in patients with mCRPC**

|                             | n (%)       | OS     |             |          |
|-----------------------------|-------------|--------|-------------|----------|
|                             |             | Median | 95% CI      | p value* |
| <b>IDC-P status</b>         |             |        |             |          |
| IDC-P(+)                    | 62 (47.3%)  | 14.7   | 9.28–20.12  | 0.002    |
| IDC-P(–)                    | 69 (52.7%)  | 34.5   | 26.56–42.44 |          |
| <b>Age (y)</b>              |             |        |             |          |
| ≥ 75                        | 95 (72.5%)  | 25.12  | 21.32–28.92 | 0.576    |
| < 75                        | 36 (27.5%)  | 22     | 10.19–33.82 |          |
| <b>CFS (mo)</b>             |             |        |             |          |
| ≥ 10                        | 85 (64.9%)  | 34.5   | 26.74–42.26 | < 0.001  |
| < 10                        | 46 (35.1%)  | 10.1   | 7.15–13.05  |          |
| <b>Treatment</b>            |             |        |             |          |
| 1st treatment               | 96 (73.3%)  | 30.7   | 24.30–37.10 | 0.007    |
| BSC and others              | 35 (26.7%)  | 15.8   | 6.24–25.36  |          |
| <b>Gleason score</b>        |             |        |             |          |
| < 8                         | 21 (16.0%)  | 27.3   | 22.4–32.2   | 0.040    |
| 8–10                        | 110 (84.0%) | 22.3   | 19.2–25.3   |          |
| <b>ECOG score</b>           |             |        |             |          |
| ≥ 2                         | 100 (76.3%) | 15.8   | 8.84–22.76  | < 0.001  |
| < 2                         | 31 (23.7%)  | 34.5   | 26.74–42.26 |          |
| <b>Pain score</b>           |             |        |             |          |
| > 3                         | 45 (34.4%)  | 9.5    | .68–11.32   | < 0.001  |
| ≤ 3                         | 86 (65.6%)  | 39.1   | 26.07–52.13 |          |
| <b>Bone Scan Lesions</b>    |             |        |             |          |
| ≥ 10                        | 84 (64.1%)  | 17.5   | 10.47–24.53 | 0.041    |
| < 10                        | 47 (35.9%)  | 30.7   | 23.98–37.42 |          |
| <b>PSADT (days)</b>         |             |        |             |          |
| ≥ 30                        | 95 (72.5%)  | 30.7   | 22.45–38.95 | 0.012    |
| < 30                        | 36 (27.5%)  | 12.2   | 7.77–16.63  |          |
| <b>Testosterone (ng/mL)</b> |             |        |             |          |
| ≥ 0.09                      | 71 (54.2%)  | 28.5   | 19.97–37.04 | 0.847    |
| < 0.09                      | 60 (45.8%)  | 22     | 11.36–32.64 |          |
| <b>HGB (g/L)</b>            |             |        |             |          |
| < 120                       | 33 (25.2%)  | 16.5   | 0.00–33.98  | 0.174    |
| ≥ 120                       | 98 (74.8%)  | 30.7   | 22.13–39.27 |          |
| <b>LDH (IU/L)</b>           |             |        |             |          |
| ≥ 250                       | 71 (54.2%)  | 16.8   | 11.32–22.28 | 0.001    |
| < 250                       | 60 (45.8%)  | 39.1   | 27.08–51.12 |          |
| <b>ALP (IU/L)</b>           |             |        |             |          |
| ≥ 160                       | 58 (44.3%)  | 11.6   | 5.42–17.78  | < 0.001  |
| < 160                       | 73 (55.7%)  | 34.5   | 24.40–44.60 |          |

\*Log-rank test.

CRPC = castration-resistant prostate cancer; CFS = CRPC free survival; IDC-P = intraductal carcinoma of the prostate; BSC = best supportive care; ECOG = Eastern Cooperative Oncology Group; PSA = prostate specific antigen; PSADT = prostate specific antigen doubling time; HGB = hemoglobin; LDH = lactate dehydrogenase; ALP = alkaline phosphatase.

## Supplementary Table 2: Summary of studies about the prognostic role of IDC-P in patients with prostate cancer

| Study                   | Country            | Pathological Specimens    | Patients                      | N   | Main conclusion                                                                                                                                                                                                                                                                                                                                                                                                                                 |
|-------------------------|--------------------|---------------------------|-------------------------------|-----|-------------------------------------------------------------------------------------------------------------------------------------------------------------------------------------------------------------------------------------------------------------------------------------------------------------------------------------------------------------------------------------------------------------------------------------------------|
| Cohen 1998 [25]         | RJ New Zealand     | Prostate biopsy specimens | Localized PCa                 | 59  | IDC-P was an independent variable that significantly improved the prediction of pathological stage and tumor volume, and furthermore, was closely related to ( $r = 0.53, p = 0.001$ ) and accurately predicted treatment failure.                                                                                                                                                                                                              |
| O'Brien 2010 [26]       | C Portland         | RP specimens              | High risk PCa                 | 57  | In both univariate analyses ( $p = 0.001$ ) and multivariate analyses ( $p = 0.007$ ), IDC-P was associated with shorter relapse-free survival.                                                                                                                                                                                                                                                                                                 |
| Efstathiou 2010 [27]    | E America          | RP specimens              | High risk PCa                 | 115 | The presence of cribriform or intraductal spread morphology was a strong predictor of biochemical relapse (Relative risk = 2.98, $p < 0.001$ ).                                                                                                                                                                                                                                                                                                 |
| Van der Kwast 2012 [28] | Canada and Belgium | Prostate biopsy specimens | Intermediate or high risk PCa | 250 | IDC-P was a strong prognosticator for early (< 36 months) biochemical relapse (HR, 95% CI: 7.3, 1.7–30.4; $p = 0.007$ ) in patients with intermediate risk PCa.<br>IDC-P was a strong prognosticator for clinical disease-free survival in patients with high risk PCa treated with radiotherapy (HR, 95% CI: 3.54, 1.88–6.69; $p < 0.0001$ ) or radiotherapy plus long-term androgen deprivation (HR, 95% CI: 2.83, 1.16–6.92; $p = 0.0018$ ). |
| Miyai 2014 [29]         | K America          | RP specimens              | localized PCa                 | 901 | IDC-P was a marker of adverse pathologic features and clinical aggressiveness. Patients with IDC-P were with shorter biochemical recurrence than those with high-grade prostatic intraepithelial neoplasia (Log-rank test, $p < 0.0001$ ) or atypical cribriform lesion (Log-rank test, $p < 0.022$ ).                                                                                                                                          |
| Trudel 2014 [30]        | D Canada           | RP specimens              | localized PCa                 | 246 | The presence of any amount of large cribriform or IDC-P had a highly significant prognostic effect on biochemical recurrence-free rate (HR, 95% CI: 2.98, 1.68–5.28, $p = 0.0002$ ) after adjusting for GS, surgical margin status and pathological stage.                                                                                                                                                                                      |
| Kimura 2015 [31]        | K Japan            | RP specimens              | High risk PCa                 | 206 | IDC-P in RP specimens was an independent risk factor for progression-free survival (HR, 95%CI: 3.07, 1.44–6.58, $p = 0.0038$ ) and cancer-specific survival (HR, 95% CI: 4.48, 1.22–16.41, 0.0238).                                                                                                                                                                                                                                             |
| Zhao T 2015 [14]        | China              | Prostate biopsy specimens | Metastatic PCa                | 278 | The presence of IDC-P was not only an independent prognostic factor predicting shorter time of CRPC (HR = 4.031, $P = 0.035$ ), but also for poorer OS (HR = 2.499, $P = 0.006$ )                                                                                                                                                                                                                                                               |
| Chen Z 2015 [15]        | China              | Prostate biopsy specimens | mCRPC                         | 45  | IDC-P was significantly associated with rapid disease progression. 13/28 (46.4%) CRPC patients with IDC-P had PSADT less than 30 days, while, only 1/17 (5.9%) patient without IDC-P had a less than 30 days PSADT ( $X^2 = 8.114, P = 0.004$ ).<br>Among patients treated with docetaxel ( $n = 24$ ), those with IDC-P showed more unfavorable response than those without IDC-P (20% vs. 66.7%, $P = 0.022$ ).                               |
| Kato M 2016 [32]        | Japan              | Prostate biopsy specimens | metastatic PCa                | 150 | The presence of IDC-P was a significant prognostic parameter for cancer-specific survival (HR, 95% CI: 2.13, 1.14–3.99, $p = 0.0181$ ) and overall survival (HR, 95% CI: 2.66, 1.47–4.79, $p = 0.0012$ ) in PCa patients with distant metastasis at presentation.                                                                                                                                                                               |
| Saeter 2017 [33]        | T Norway           | Prostate biopsy specimens | PCa (M0 or Mx)                | 283 | IDC-P on diagnostic needle biopsy is an indicator of prostate cancer with a high risk of mortality. (HR, 95% CI: 3.3, 2.0–5.7, $p < 0.001$ in univariate analysis; HR, 95%CI: 1.7, 0.9–2.8, $p = 0.07$ in multivariate analysis)                                                                                                                                                                                                                |
| Kweldam 2017 [34]       | CF Nederland       | Prostate biopsy specimens | localized PCa                 | 486 | The presence of cribriform and intraductal growth in prostate cancer, is a strong clinical prognostic marker with poorer OS (HR, 95% CI: 2.6, 1.4–4.8, $p = 0.002$ )                                                                                                                                                                                                                                                                            |

RP = Radical prostatectomy; N = sample size; PCa = Prostate cancer; mCRPC = metastatic castration-resistant prostate cancer; HR=hazard ratio; CI = confidence interval. GS = Gleason score; OS = overall survival; PSADT = PSA-doubling time.
